# Supplementary material
Source: HighWire-hosted journal article supplement (http://thorax.bmjjournals.com/highwire/filestream/174880/field_highwire_adjunct_files/0/thx.2007.082636supp_appendix.pdf)
Supplement: thx.2007.082636supp_appendix.pdf [file thx.2007.082636supp_appendix.pdf]

Table 1: Characteristics of the 22 randomized clinical trials included in the systematic review:

| Study                                   | Medications Evaluated                       | Duration of trial/ no randomized | Definition of AECOPD | Patients who prematurely stopped study meds retained in trial? | Temporal independence established?/ Blinded adjudication of events? | Outcomes Reported: Proportions having $\geq 1$ exacerbation, Mean exac/pt-y, or both. | Weighted statistical approach used? | Over-dispersion accounted for? |
|-----------------------------------------|---------------------------------------------|----------------------------------|----------------------|----------------------------------------------------------------|---------------------------------------------------------------------|---------------------------------------------------------------------------------------|-------------------------------------|--------------------------------|
| Mahler, AmJRCCM 2002(37)                | F/S, Salmeterol,                            | 24 weeks<br>N = 691              | Event-based          | Yes                                                            | No/No                                                               | Proportions                                                                           | N/A*                                | N/A*                           |
| Szafranski, ERJ 2003(38)                | B/F, Formoterol,                            | 12 months<br>N= 812              | Event-based          | No                                                             | No/No                                                               | Mean exacerbations/<br>pt-y                                                           | Yes                                 | Yes                            |
| Calverley, Lancet 2003(39)              | F/S, Salmeterol                             | 12 months<br>N= 1465             | Event-based          | No                                                             | No/No                                                               | Mean exacerbations/<br>pt-y                                                           | Yes                                 | No                             |
| Calverley, ERJ 2003(40)                 | B/F, Formoterol,                            | 12 months<br>N = 1022            | Event-based          | No                                                             | No/No                                                               | Mean exacerbations/<br>pt-y                                                           | Yes                                 | Yes                            |
| Hanania, Chest 2003(41)                 | F/S, Salmeterol                             | 24 weeks<br>N= 723               | Event-based          | No                                                             | No/No                                                               | Proportions                                                                           | N/A                                 | N/A                            |
| Dal Negro, PulmPharm & Therap. 2003(42) | F/S, Salmeterol, Theophylline               | 52 weeks<br>N = 18               | Event-based          | N/A (no dropouts)                                              | No/No                                                               | Mean exacerbations/<br>pt-y                                                           | N/A (no dropouts)                   | No                             |
| Wouters, Thorax 2005(43)                | F/S, Salmeterol with Fluticasone withdrawal | 52 weeks<br>N = 373              | Event-based          | No                                                             | Temporal independence established for mild exacerbations only/ No   | Mean exacerbations/<br>pt-y                                                           | No                                  | No                             |
| Kardos, AmJRCCM 2006(44)                | F/S, Salmeterol                             | 44 weeks<br>N = 994              | Event-based          | No                                                             | No/No                                                               | Mean exacerbations/<br>pt-y                                                           | Yes                                 | No                             |
| Casaburi, ERJ 2002(45)                  | Tiotropium                                  | 52 weeks<br>N = 921              | Symptom-based        | No                                                             | No/No                                                               | Both                                                                                  | No                                  | No                             |
| Vincken, ERJ 2002(46)                   | Tiotropium, Ipratropium                     | 52 weeks<br>N = 535              | Symptom-based        | No                                                             | No/No                                                               | Both                                                                                  | No                                  | No                             |
| Brusasco, Thorax 2003(47)               | Tiotropium, Salmeterol                      | 24 weeks<br>N = 1207             | Symptom-based        | No                                                             | No/No                                                               | Both                                                                                  | No                                  | No                             |
| Niewoehner, Annals Int Med 2005(48)     | Tiotropium                                  | 24 weeks<br>N = 1829             | Event-based          | Yes                                                            | No/No                                                               | Both                                                                                  | No                                  | No                             |
| Briggs, PulmPharm & Therap. 2005(49)    | Tiotropium, Salmeterol                      | 12 weeks<br>N = 653              | Symptom-based        | No                                                             | No/No                                                               | Both                                                                                  | No                                  | No                             |
| Dusser, ERJ 2006(50)                    | Tiotropium                                  | 52 weeks<br>N = 1010             | Event-based          | No                                                             | No/No                                                               | Both                                                                                  | No                                  | No                             |
| Beeh, Pneumologie 2006(51)              | Tiotropium                                  | 12 weeks<br>N = 1639             | Event-based          | Yes                                                            | No/No                                                               | Proportions                                                                           | N/A                                 | N/A                            |

|                                 |                             |                      |                                                                                              |         |       |             |     |     |
|---------------------------------|-----------------------------|----------------------|----------------------------------------------------------------------------------------------|---------|-------|-------------|-----|-----|
| Van Noord,<br>ERJ 2000(30)      | Salmeterol,<br>Ipratropium  | 12 weeks<br>N = 144  | Event-based                                                                                  | Yes     | No/No | Proportions | N/A | N/A |
| ZuWallack,<br>Chest 2001(31)    | Salmeterol,<br>Theophylline | 12 weeks<br>N = 943  | Event-based                                                                                  | Yes     | No/No | Proportions | N/A | N/A |
| Rennard,<br>AmJRCCM<br>2003(32) | Salmeterol,<br>Ipratropium  | 12 weeks<br>N = 405  | Event-based                                                                                  | No      | No/No | Proportions | N/A | N/A |
| Chapman,<br>CRJ 2002(33)        | Salmeterol,<br>Ipratropium  | 24 weeks<br>N = 408  | Event-based                                                                                  | Yes     | No/No | Proportions | N/A | N/A |
| Rossi,<br>Chest 2002(34)        | Formoterol,<br>Theophylline | 12 months<br>N = 854 | Symptom-<br>based for<br>mild<br>exacerbations<br>Event-based<br>for moderate<br>and severe. | No      | No/No | Proportions | N/A | N/A |
| Celli,<br>Resp Med<br>2003(35)  | Salmeterol,<br>Sibenaedet   | 12 weeks<br>N = 1368 | Event-based                                                                                  | Unclear | No/No | Proportions | N/A | N/A |
| Stockley,<br>Thorax 2006(36)    | Salmeterol                  | 12 months<br>N = 634 | Event-based                                                                                  | No      | No/No | Both        | No  | No  |

\*Use of a weighted statistical technique and correction of over-dispersion is applicable only to those studies that reported mean exacerbations/patient-year

F/S = fluticasone/salmeterol

B/F= budesonide/formoterol
